# Supplementary material
Source: publisher figshare collection journal article supplement (https://frontiersin.figshare.com/ndownloader/files/28484112)

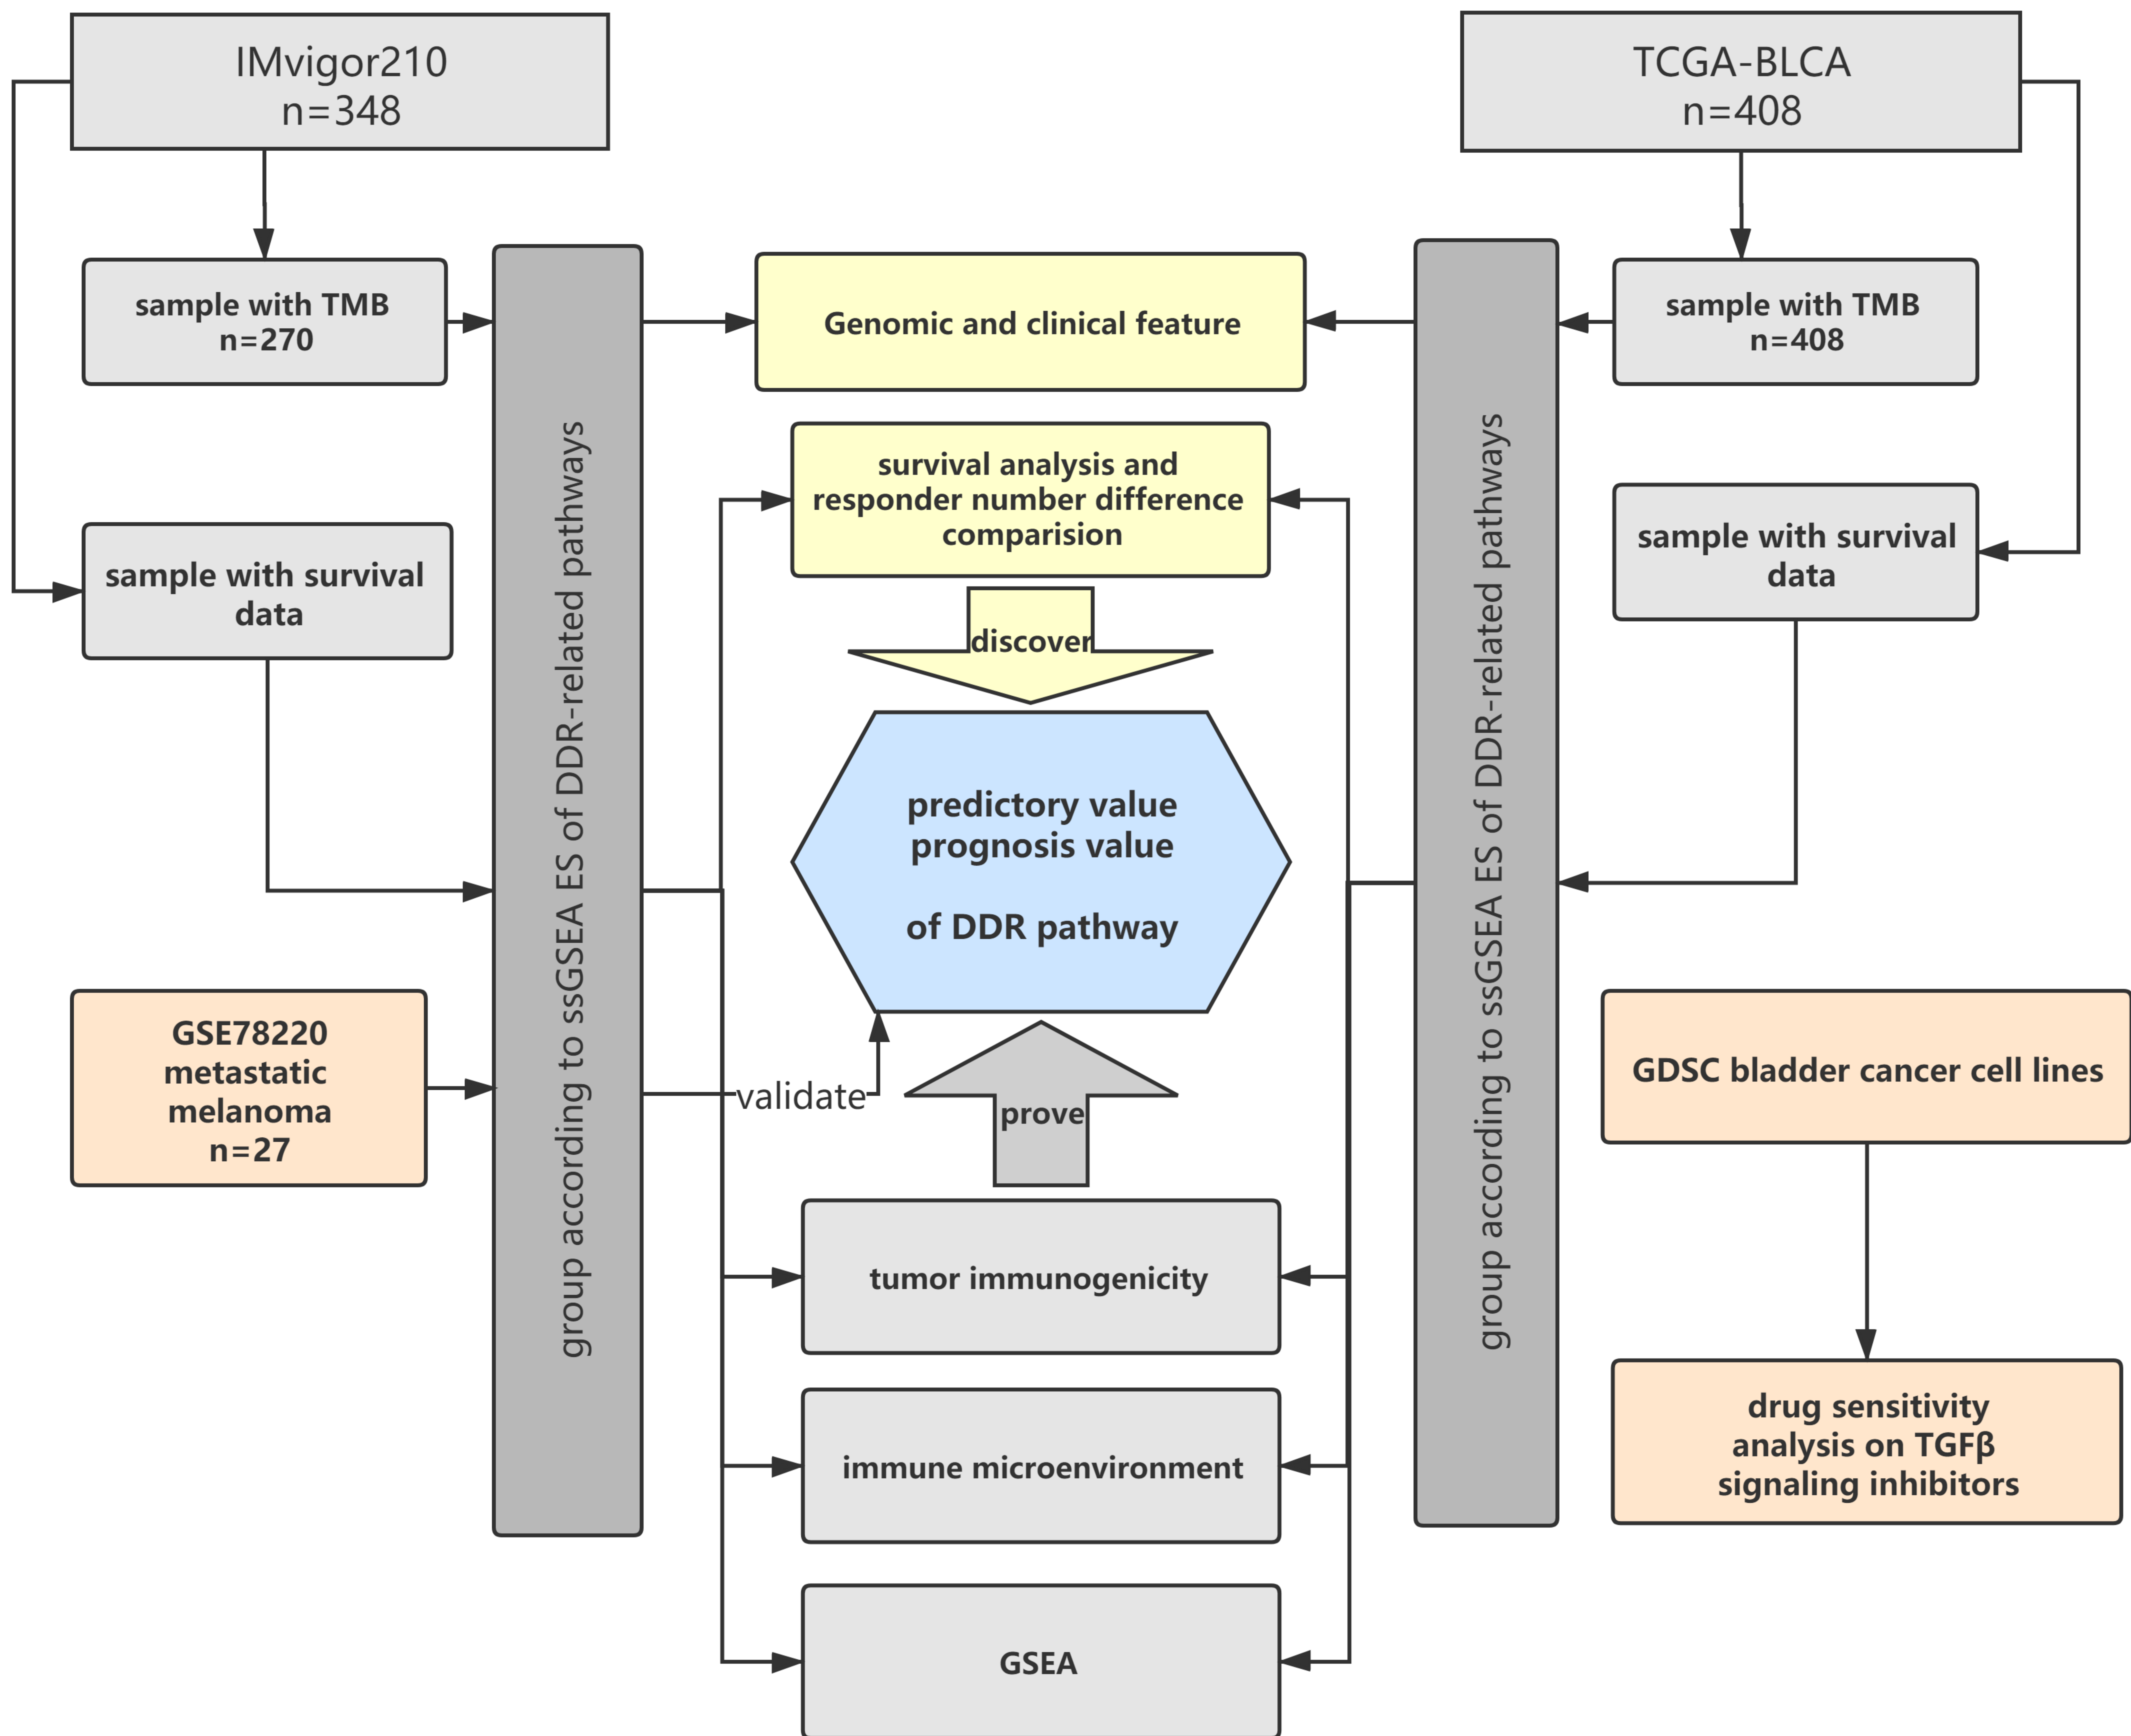

Supplement: Supplementary file [file 28484112]
